# Supplementary material for: Therapeutic relevance of molecular screening program in patients with metastatic sarcoma: Analysis from the ProfiLER 01 trial
Source: PubMed Central journal article supplement — Transl Oncol. 2020 Sep 18;13(12):100870. doi: 10.1016/j.tranon.2020.100870 (PMC7509228; doi:10.1016/j.tranon.2020.100870), 2020-09-18
Supplement: mmc1.pdf [file mmc1.pdf]

**Supplementary Table S1. Gene lists for NGS Version 1 and 2.** Refseq: Reference of the transcript in the NCBI database used for NGS sequencing.

| Gene          | RefSeq       | Exons    | Gene          | RefSeq       | Exons   | Gene           | RefSeq       | Exons   |
|---------------|--------------|----------|---------------|--------------|---------|----------------|--------------|---------|
| <i>ABL1</i>   | NM_007313    | 1 to 11  | <i>FGFR3</i>  | NM_000142    | 2 to 19 | <i>PTCH1</i>   | NM_001083603 | 1 to 28 |
| <i>AKT1</i>   | NM_005163    | 4        | <i>FGFR4</i>  | NM_002011    | 2 to 18 | <i>PTEN</i>    | NM_000314    | 1 to 9  |
| <i>AKT2</i>   | NM_001626    | 2 to 14  | <i>GNAQ</i>   | NM_002072    | 5       | <i>RB1</i>     | NM_000321    | 1 to 27 |
| <i>ALK</i>    | NM_004304    | 1 to 29  | <i>HRAS</i>   | NM_005343    | 2 to 4  | <i>RET</i>     | NM_020975    | 1 to 20 |
| <i>APC</i>    | NM_001127511 | 1 to 15  | <i>IGF1R</i>  | NM_000875    | 1 to 4  | <i>ROR1</i>    | NM_005012    | 1 to 9  |
| <i>AXL</i>    | NM_021913    | 1 to 20  | <i>JAK2</i>   | NM_004972    | 1 to 25 | <i>ROR2</i>    | NM_004560    | 1 to 9  |
| <i>BRAF</i>   | NM_004333    | 15       | <i>JAK3</i>   | NM_000215    | 2 to 24 | <i>ROS1</i>    | NM_002944    | 1 to 43 |
| <i>BRCA1</i>  | NM_007294    | 2 to 24  | <i>KDR</i>    | NM_002253    | 1 to 30 | <i>RYK</i>     | NM_002958    | 1 to 15 |
| <i>BRCA2</i>  | NM_000059    | 2 to 27  | <i>KIT</i>    | NM_000222    | 1 to 21 | <i>SDHAF2</i>  | NM_017841    | 1 to 43 |
| <i>RAF1</i>   | NM_002880    | 1 to 17  | <i>KRAS</i>   | NM_004985    | 2 et 3  | <i>SDHB</i>    | NM_003000    | 1 to 8  |
| <i>CDKN2A</i> | NM_000077    | 1 to 3   | <i>MERTK</i>  | NM_006343    | 1 to 19 | <i>SDHC</i>    | NM_001035511 | 1 to 5  |
| <i>CSF1</i>   | NM_172212    | 1 to 9   | <i>MET</i>    | NM_001127500 | 2 to 21 | <i>SDHD</i>    | NM_003002    | 1 to 43 |
| <i>CSF1R</i>  | NM_005211    | 2 to 22  | <i>MPL</i>    | NM_005373    | 1 to 12 | <i>SMARCB1</i> | NM_003073    | 1 to 9  |
| <i>DDB2</i>   | NM_000107    | 1 to 10  | <i>MST1R</i>  | NM_001244937 | 1 to 19 | <i>SMO</i>     | NM_005631    | 1 to 12 |
| <i>DDR1</i>   | NM_001202523 | 3 to 21  | <i>MTOR</i>   | NM_004958    | 1 to 58 | <i>SRC</i>     | NM_005417    | 4 to 14 |
| <i>DDR2</i>   | NM_006182    | 4 to 19  | <i>MUSK</i>   | NM_001166280 | 1 to 16 | <i>STK11</i>   | NM_000455    | 1 to 10 |
| <i>EGFR</i>   | NM_005228    | 19 to 21 | <i>NRAS</i>   | NM_002524    | 2 to 4  | <i>TEK</i>     | NM_000459    | 1 to 23 |
| <i>ERBB2</i>  | NM_004448    | 1 to 27  | <i>PDGFA</i>  | NM_033023    | 1 to 17 | <i>TIE1</i>    | NM_005424    | 1 to 23 |
| <i>FLT1</i>   | NM_002019    | 1 to 32  | <i>PDGFB</i>  | NM_002608    | 1 to 8  | <i>TP53</i>    | NM_000546    | 2 to 12 |
| <i>FLT3</i>   | NM_004119    | 1 to 24  | <i>PDGFRA</i> | NM_006206    | 2 to 23 | <i>TSC1</i>    | NM_001162427 | 3 to 23 |
| <i>FLT4</i>   | NM_182925    | 1 to 30  | <i>PDGFRB</i> | NM_002609    | 2 to 23 | <i>TSC2</i>    | NM_000548    | 2 to 42 |
| <i>FGFR1</i>  | NM_023106    | 4 to 21  | <i>PIK3CA</i> | NM_006218    | 10 et   | <i>TYRO3</i>   | NM_006293    | 1 to 10 |
| <i>FGFR2</i>  | NM_000141    | 2 to 27  | <i>PIK3R1</i> | NM_181523    | 2 to 16 | <i>VHL</i>     | NM_000551    | 1 to 9  |

Genes added in Panel V2 (October 2014)

For most of these genes (61/69), the coding areas were sequenced to 250\*average depth and achieved a 90% breadth of coverage at a minimum depth of 50 reads. The sequencing was focused on the hotspot regions of targetable or clinically relevant mutations for the remaining eight genes.

## Supplementary information S2. Characterization procedures and classification of molecular alterations.

The size distribution of the DNA amplicons was analyzed on the 2200 TapeStation (Agilent Technologies, Santa Clara, USA) using the High Sensitivity DNA Reagent Kit (Agilent Technologies Santa Clara, USA). Template preparation, emulsion PCR, and Ion Sphere Particle (ISP) enrichment were performed using the Ion OneTouch™ 2 kit (Thermo Fisher Scientific, Waltham, Massachusetts, USA) according to manufacturer's instructions. The ISPs were loaded onto an Ion 318™ Chip Kit V2 (Thermo Fisher Scientific, Waltham, Massachusetts, USA) and sequenced using an Ion PGM™ Sequencing 200 Kit V2 (Thermo Fisher Scientific, Waltham, Massachusetts, USA) on the Ion Torrent PGM™ for 500 cycles.

The pipeline includes quality score assignment, alignment to the human genome 19 reference, mapping quality QC, coverage analysis, and variant calling. After completion of the primary data analysis, lists of detected sequence variants (Single nucleotide variants [SNVs] and INDELs) were compiled in the Variant Call Format (VCF) files. For downstream analysis, variants with minimum coverage of 50 reads containing at least 10 mutant reads were selected. Variant calls were further analyzed using variant filtering and annotation using COSMIC v.64 released on 2013, March 26th<sup>online version only</sup> [20] and dbSNP build 135, released on 2012, June 6th.<sup>online version only</sup> [21] The variants were filtered according to their frequency (>5% for SNVs and >10% for INDELs), strand ratio (>0.2), and reads coverage (>50X for SNVs and 100X for INDELs).

We used the knowledge database of somatic mutations Cosmic v.64 released on 2013, March 26th, to classify each selected variant as 'pathogenic', 'unknown pathogenicity', or 'probable pathogenicity' variants. Oncogenes with known activating mutations and amplifications (gene copy number  $\geq 6$ ) prevailed. Well characterized hot-spot mutations such as *PI3KCA* mutations (E542K, E545K/Q, H1047L/R) were selected for treatment recommendation. Homozygous deletion or bi-allelic inactivation (inactivating mutation and/or heterozygous deletion) for tumor suppressor genes (such as *PTEN*) were then taken into account. Passenger mutations or mutations known to be related to treatment resistance (for instance *KRAS*) were taken into account only in respect of specific tumor types Gene gains or heterozygous deletions were not considered.

The MTB defined a MBRT on the basis of the availability of drugs hitting either directly the selected target protein or the pathway activated by the altered protein.
